# Supplementary material
Source: Royal Society of Chemistry journal article supplement (doi:10.1039/d6tb00112b)
Supplement: d6tb00112b1.pdf [file d6tb00112b1.pdf]

## TABLE OF CONTENTS

|    |                                              |     |
|----|----------------------------------------------|-----|
| 22 | <b>Experimental section</b> .....            | S3  |
| 23 | Reagents and materials .....                 | S3  |
| 24 | Apparatus and measurements. ....             | S3  |
| 25 | Preparation of ITO/ZnCdS/Ce-MOF Gate. ....   | S4  |
| 26 | Preparation of Gold Nanoparticles .....      | S4  |
| 27 | SRCHA Amplification Strategy. ....           | S4  |
| 28 | Polypropylene gel electrophoresis(PAGE)..... | S5  |
| 29 | <b>Partial results</b> .....                 | S6  |
| 30 | Fig S1 .....                                 | S6  |
| 31 | Fig S2 .....                                 | S6  |
| 32 | Fig S3 .....                                 | S7  |
| 33 | Table S2 .....                               | S7  |
| 34 | Table S3 .....                               | S8  |
| 35 | Table S4 .....                               | S8  |
| 36 | Fig S4 .....                                 | S9  |
| 37 | Fig S5 .....                                 | S9  |
| 38 | Fig S6 .....                                 | S10 |
| 39 | Optimization of experimental conditions..... | S10 |
| 40 | Fig S7 .....                                 | S10 |
| 41 | Fig S8 .....                                 | S11 |
| 42 | <b>References</b> .....                      | S11 |

## 44 EXPERIMENTAL SECTION

45 **Reagents and materials.** The reagents and materials used in this experiment primarily included  
46  $Zn(Ac)_2 \cdot 2H_2O$ ,  $Cd(Ac)_2 \cdot 2H_2O$ , thiourea, NaOH, absolute alcohol,  $H_3BTC$ ,  $Ce(NO_3)_3 \cdot 6H_2O$  and  $H_2O_2$ , all  
47 of which were purchased from Shanghai Aladdin Biochemical Technology Co., Ltd. N-  
48 Hydroxysuccinimide (NHS), 1-Ethyl-3-(3-dimethylaminopropyl)carbodiimide hydrochloride (EDC), N,N-  
49 dimethylformamide, chloroauric acid, and potassium nitrate ( $KNO_3$ , AR) were sourced from Sinopharm  
50 Chemical Reagent Co., Ltd. Dinotefuran, thiamethoxam, clothianidin, acetamiprid, carbendazim,  
51 imidacloprid and sequences of the oligonucleotides listed in Table S1 were obtained from Shanghai  
52 Bioengineering Co., Ltd. The ultrapure water used throughout the experiments was supplied by a Direct-Q  
53 ultrapure water system (Millipore Corporation, USA).

54 **Table S1.** Oligonucleotide sequences used in this study

| Oligonucleotide name | Sequence (5' to 3') description                                                        |
|----------------------|----------------------------------------------------------------------------------------|
| Apt                  | GTTTIGGTTGTTGTTTGTGGTGGGTGTA                                                           |
| T                    | TACACCCACCAACAAACAACCAAAAAC                                                            |
| H1                   | TACACCCACCAACAAAGTTTTGGTTGTTGTTTGTGGTGGGTGTA<br>TTAAACATACCTTTACACCCACCAACAAACAACCAACC |
| H2                   | GGTTGTTGTTTGTGGTGGGTGTAAAGGTATGTTTAATACACCCA<br>CCAACAAACAACCAAAAACCAACAACCAAAAAC      |
| Apt-W1               | TACACCCACCAACGAACAACCAAAAAC                                                            |
| Apt-W2               | TACACCCACTAACAACAACCAAAAAC                                                             |
| Apt-W3               | TACACCAACCAACGAACAACCTAAAAC                                                            |

55 **Apparatus and measurements.** Field emission scanning electron microscope (SU8000, Hitachi,  
56 Japan); Transmission electron microscope (Talos F200X, FEI, USA); Zeta potential and nanoparticle size  
57 analyzer (Zetasizer Nano ZS90, Malvern); X-ray scanner (Miniflx, RIKEN, Japan); Raman spectrometer  
58 (DXR2, Thermo); X-ray photoelectron spectrum analyzer (Verios G 4UC, Thermo Fisher Scientific);  
59 Nano-laser action instrument (Laser Nano Pro, Tianjin Jiayin Nanotechnology Co., Ltd.); Vertical

60 electrophoresis tank (DYC-Mini4, Nanjing Yucheng Experimental Equipment Co.); Gel electrophoresis  
61 instrument (DYY-600E, Beijing Dongfang Ruili Electrophoresis Equipment Co., Ltd.).  
62 Photoelectrochemical measurements (i-t) and cyclic voltammetry (CV) were performed using an  
63 electrochemical workstation (CHI-760D, Shanghai Chenhua Instruments Co., Ltd.) combined with a  
64 conventional three-electrode system, using Ag/AgCl or saturated glycerol electrodes as reference electrodes,  
65 platinum wire electrodes as auxiliary electrodes, and modified ITO electrodes as working electrodes. I-t  
66 was performed in a 0.1 M Na<sub>2</sub>SO<sub>4</sub> solution. CV was performed in a gold deposition solution containing 0.1  
67 M KNO<sub>3</sub> and 2 mM HAuCl<sub>4</sub>.

68 **Synthesis of ZnCdS**. According to the literature method with a slight modification<sup>1</sup>. 0.439 g Zn(Ac)<sub>2</sub>  
69 2H<sub>2</sub>O 0.533 g Cd(Ac)<sub>2</sub> 2H<sub>2</sub>O and 0.3806 g thiourea were mixed with 10 mL deionized water (DIW). After  
70 stirring a few minutes, 2 mL 4 M NaOH were added dropwise into above solution with strong stirring until  
71 forming a homogenous solution. Then, the resulting mixed solution was transferred to 25 mL stainless steel  
72 case with PTFE liner, and maintained for 24 h at 180 °C. After cooling naturally, the final powder was  
73 collected and rinsed three times with DIW and absolute alcohol, and dried at 80 °C under vacuum for 10 h.

74 **Synthesis of Ce-MOF**. Ce(III, IV)-MOF was prepared according to a facile in situ partial oxidation Ce-  
75 MOF<sup>2</sup>. Briefly, 0.105 g H<sub>3</sub>BTC (0.5 mM) was dissolved in 5 mL water-ethanol solution (v/v = 1:1), at the  
76 same time, 0.217 g Ce(NO<sub>3</sub>)<sub>3</sub>·6H<sub>2</sub>O (0.5 mM) was dissolved in 5 mL ultrapure water. After that, the  
77 Ce(NO<sub>3</sub>)<sub>3</sub>·6H<sub>2</sub>O solution was added to the H<sub>3</sub>BTC solution dropwisely under vigorous stirring and was  
78 kept in water bath at 60 °C for 1 h. After the reaction, the white precipitate was obtained by centrifugation  
79 and rinsing with ultrapure water, followed by drying at 60 °C. In this way, the white product of Ce-MOF  
80 was obtained. Later on, 30 mg of the above Ce-MOF was resolved in 6 mL ultrapure water with ultrasonic  
81 dispersion. Subsequently, 75 μL of fresh NaOH and H<sub>2</sub>O<sub>2</sub> mixed solution was added for in situ partial  
82 oxidation. After reaction for 5 min, the suspension turned yellow. Finally, the product of Ce(III, IV)-MOF  
83 was collected by centrifugation and dried under vacuum at 60 °C.

84 **Preparation of ITO/ZnCdS/Ce-MOF Gate**. First, the ITO substrate was placed in a mixed solution of  
85 ultrapure water and ethanol and sonicated for 10 minutes for cleaning. It was then rinsed several times with  
86 deionized water and dried. Subsequently, 3 mg of ZnCdS and 2 mg of Ce-MOF were weighed separately  
87 and added to 1 ml of deionized water, followed by sonication for 20 minutes to ensure thorough dissolution.  
88 Then, 20 μL of the ZnCdS dispersion was drop-cast onto the surface of the ITO substrate and dried in an  
89 oven at 60 °C. After removal, 20 μL of the Ce-MOF dispersion was drop-cast onto the surface and reacted  
90 in a vacuum oven at 60 °C for 6 hours, yielding the ITO/ZnCdS/Ce-MOF electrode.

91 **Preparation of Gold Nanoparticles**. Au NPs were synthesized according to a previously reported  
92 method<sup>3</sup>. In a typical experiment, 0.05 mmol HAuCl<sub>4</sub> and 20 mg PVP were added to 45 mL water under  
93 vigorous stirring. After 5 min, 5 mL NaBH<sub>4</sub> solution (100 mM) was introduced. The reaction mixture was

94 stirred at room temperature for 24 h. In particular, the Au NPs were synthesized by reacting at 80 °C for 3 h  
95 and then stirring at room temperature for 24 h.

96 **SRCHA Amplification Strategy.** Before the reaction, the mixture of imidacloprid aptamer and T  
97 strand, along with the stock solutions of H1 and H2, was heat-treated at 95°C for 5 min, followed by slow  
98 cooling to room temperature to form stable DNA duplexes and hairpin structures. First, 100 µL of H2 (1 µM,  
99 thiol-modified) was mixed with 100 µL of Au NPs and stirred at room temperature for 30 min. Then, 100  
100 µL of carboxylated magnetic beads (MBs) solution (5 mg/mL) was added to 900 µL of PBS buffer (0.01 M,  
101 pH 7.4) containing EDC (2.5 mg/mL) and NHS (2.5 mg/mL). The mixture was allowed to react at room  
102 temperature for 15 min to activate the carboxyl groups on the surface of the magnetic beads. The resulting  
103 mixture was washed three times with PBS buffer and separated magnetically to obtain the MB-H2-Au NPs  
104 structure, which was then redispersed in PBS solution. Subsequently, different concentrations of  
105 imidacloprid solution (100 µL), H2 (10 µM, 100 µL), the T-DNA-aptamer duplex (10 µM, 100 µL), and  
106 100 µL of H1 (1 µM) were added at room temperature to 700 µL of PBS solution containing MB-H2-Au  
107 NPs for SRCHA amplification for 30 min. The long DNA chains obtained were magnetically separated and  
108 then transferred into a mixed solution containing EDC (2.5 mg/mL) and NHS (2.5 mg/mL) for reaction  
109 over 15 minutes. Subsequently, 100 µL of glucose (5 mmol/L) was added and allowed to react for 30  
110 minutes. Finally, 20 µL of the resulting product was drop-cast onto the surface of the ITO/ZnCdS/Ce-MOF  
111 electrode and allowed to react at room temperature for 20 minutes. The electrode was then gently rinsed  
112 with ultrapure water.

113 **Polypropylene gel electrophoresis(PAGE).** The DNA (2 uL) was thoroughly mixed with loading  
114 buffer (1 uL), and this mixed sample was upsampled into a 12% polyacrylamide gel. Electrophoresis was  
115 carried out in an electrophoresis tank with 1×TBE as electrolyte, and the electrophoresis apparatus was set  
116 to 200 V for 45 min. After electrophoresis, the gel was stained with 4S Red Plus in a thermostatic oscillator  
117 protected from light for 90 min. Finally, the gel could be photographed and recorded by a fully automated  
118 gel imaging system.

119

120 PARTIAL RESULTS

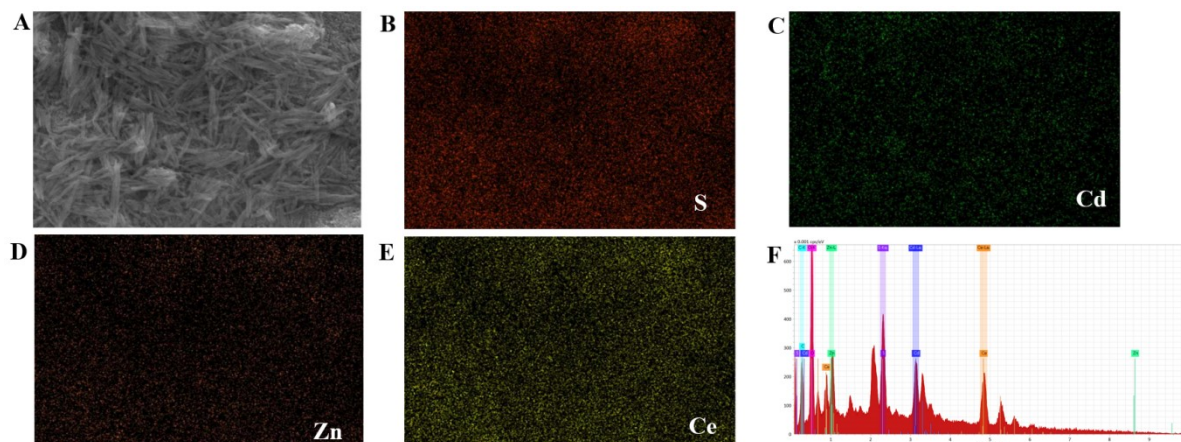

121 Fig. S1 (A) EDS elemental mapping of ZnCdS/Ce-MOF; (B) S element; (C) Cd element; (D) Zn element; (E) Ce element; (F)  
 122 EDS spectrum and elemental mapping images of ZnCdS/Ce-MOF.

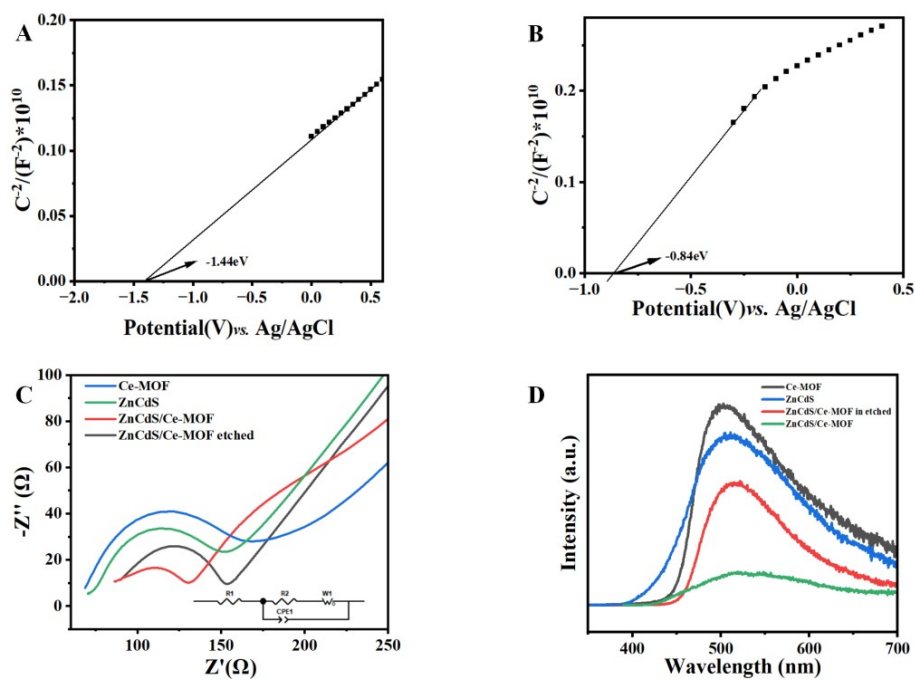

123  
 124 Fig. S2 (A) Mott-Schottky curve of ZnCdS; (B) Mott-Schottky Curve of Ce-MOF; (C) EIS Nyquist plots and (D)  
 125 Photoluminescence spectroscopy of ZnCdS,Ce-MOF, ZnCdS/Ce-MOF, and the etched ZnCdS/Ce-MOF.  
 126

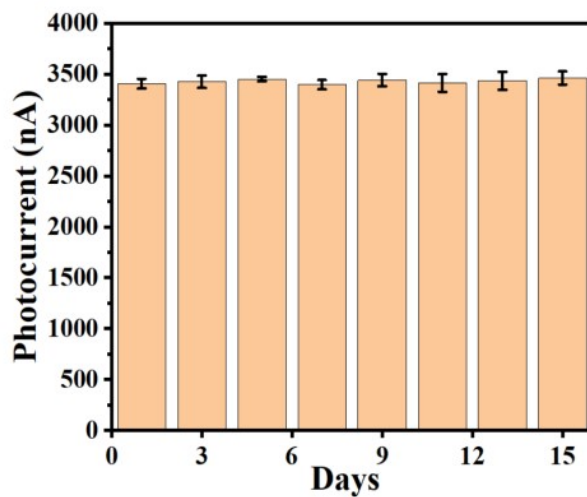

Fig. S3 Stability of the ZnCdS/Ce-MOF modified electrode over 15 days.

127  
128  
129  
130  
131  
132

**Table S2.** Inter-day reproducibility of ZnCdS/Ce-MOF modified electrodes

| Day | Response 1 (nA) | Response 2 (nA) | Response 3 (nA) | Mean±SD (nA) | RSD (%) |
|-----|-----------------|-----------------|-----------------|--------------|---------|
| 1   | 3398            | 3415            | 3406            | 3406.3±8.5   | 0.25    |
| 2   | 3409            | 3374            | 3392            | 3391.7±17.5  | 0.52    |
| 3   | 3412            | 3389            | 3401            | 3400.7±11.5  | 0.34    |
| 4   | 3405            | 3393            | 3418            | 3405.3±12.5  | 0.37    |
| 5   | 3423            | 3387            | 3402            | 3404±18.1    | 0.53    |

133

135 **Table S3.** Inter-electrode reproducibility of ZnCdS/Ce-MOF modified electrodes

| No.                | Measurement 1 | Measurement 2 | Measurement 3 | Mean±SD (nA)   | RSD (%) |
|--------------------|---------------|---------------|---------------|----------------|---------|
| 1                  | 3375          | 3379          | 3385          | 3379.3 ± 4.51  | 0.13    |
| 2                  | 3389          | 3395          | 3400          | 3394.7 ± 4.51  | 0.13    |
| 3                  | 3403          | 3410          | 3417          | 3410.0 ± 5.72  | 0.17    |
| 4                  | 3427          | 3423          | 3429          | 3426.3 ± 4.90  | 0.14    |
| 5                  | 3385          | 3396          | 3400          | 3393.7 ± 8.58  | 0.25    |
| Overall Statistics |               |               |               | 3400.5 ± 16.57 | 0.49    |

136

137

138 **Table S4** Cd<sup>2+</sup> Release Concentrations Measured by AAS

| Simple Number | Sample Description      | Cd <sup>2+</sup> concentration (µg/L) | RSD (%) (n=3) |
|---------------|-------------------------|---------------------------------------|---------------|
| 1             | Blank                   | ----                                  | ----          |
| 2             | ZnCdS/Ce-MOF            | 1.2 ± 0.08                            | 6.5           |
| 3             | The etched ZnCdS/Ce-MOF | 24.6 ± 1.5                            | 6.1           |

139

140

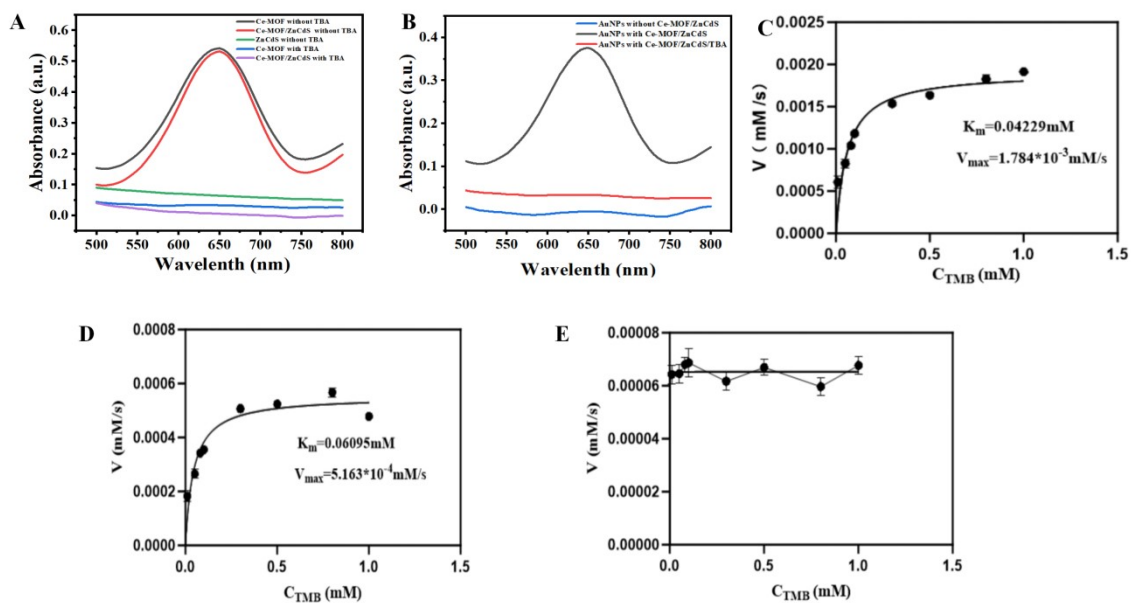

141 Fig S4. (A) Absorbance tests of ZnCdS/Ce-MOF under different experimental conditions; (B) Absorbance tests of Au NPs  
 142 under different conditions; (C) Reaction kinetic curves of Ce-MOF/ZnCdS; (D) Reaction kinetic curves of Ce-MOF; (E)  
 143 Reaction kinetic curves of ZnCdS.  
 144

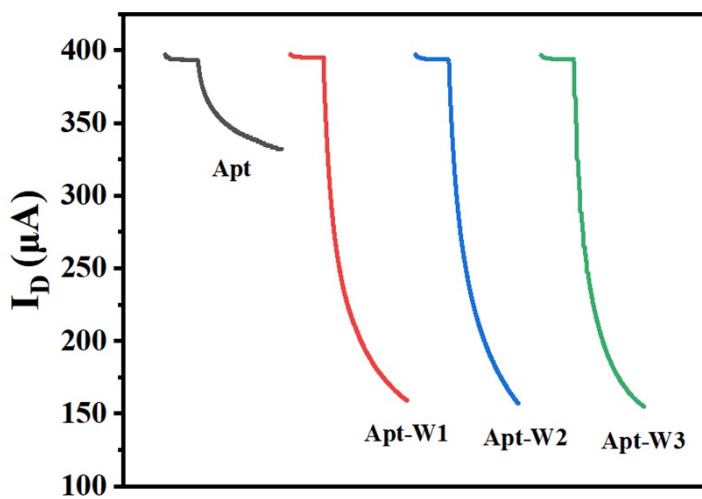

145  
 146 Fig S5. The sequence specificity of the SRCHA system.

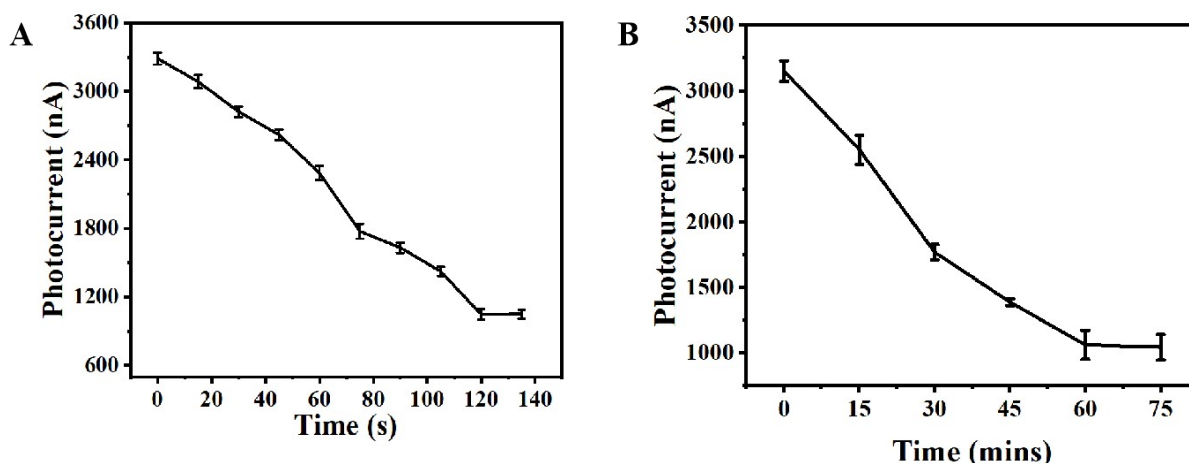

147

148

149

Fig. S6. (A) CHA reaction time; (B) SRCHA amplification time.

### 150 Optimization of experimental conditions

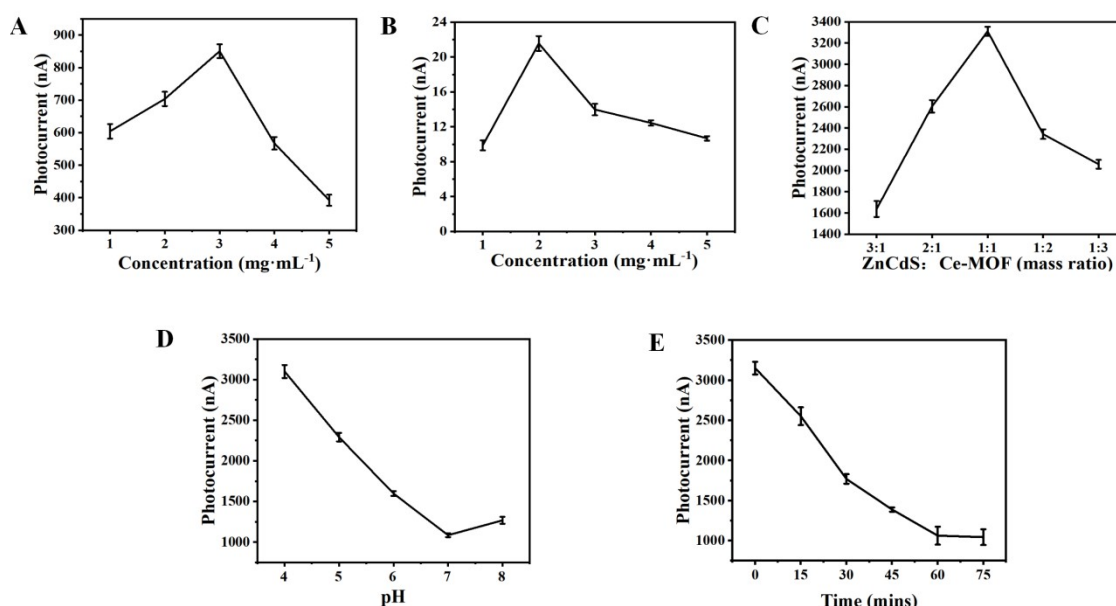

151

152 Fig S7. Optimization of (A) ZnCdS concentration; (B) Ce-MOF concentration; (C) ZnCdS:Ce-MOF mass ratio; (D) effect of

153

pH; (E) SRCHA amplification time.

154

155 As shown in Fig. S7A, the photocurrent gradually increased as the concentration of ZnCdS rose from 1 mg  
 156 mL<sup>-1</sup> to 3 mg mL<sup>-1</sup>. However, when the concentration reached 4 mg mL<sup>-1</sup>, the photocurrent decreased  
 157 significantly, indicating that an excessively high concentration impeded electron transfer and thereby  
 158 adversely affected the photocurrent. Thus, 3 mg mL<sup>-1</sup> was selected as the optimal concentration for ZnCdS.  
 159 From Fig. S7B, five different concentrations of Ce-MOF were tested. The results showed that the  
 160 photocurrent response was strongest at a concentration of 2 mg mL<sup>-1</sup>, which was therefore chosen as the  
 161 optimal concentration for Ce-MOF in subsequent experiments. The test results of the sensor varied

162 significantly under different experimental conditions. Therefore, various experimental parameters were  
163 optimized to ensure accurate and reliable results in the final testing. As shown in Fig. S7C, the photocurrent  
164 initially increased and then decreased, reaching its maximum when the mass ratio of the two materials was  
165 1:1. At this ratio, the synergistic effect between ZnCdS and Ce-MOF was strongest. Thus, a ZnCdS-to-Ce-  
166 MOF mass ratio of 1:1 was selected as the optimal condition for subsequent experiments. In Fig. S7D, as  
167 the pH increased from acidic to neutral, the photocurrent gradually decreased, indicating more efficient  
168 progression of the SRCHA reaction. When the pH was further increased to 8, the photocurrent rose again,  
169 suggesting that the DNA reaction was inhibited. Therefore, pH 7.0 was selected as the optimal reaction pH.  
170 As illustrated in Fig. S7E, the SRCHA amplification first triggers the formation of the H1+H2 duplex  
171 structure, which is a key step in the entire biorecognition event. Therefore, the optimal amplification time  
172 for SRCHA was investigated. As the amplification time increased, the resulting photocurrent decreased,  
173 indicating a more complete reaction of the final product on the electrode. When the time reached 60  
174 minutes, the change in results plateaued, suggesting that the SRCHA amplification was fully complete.  
175 Consequently, the SRCHA amplification time was determined to be 60 minutes.  
176

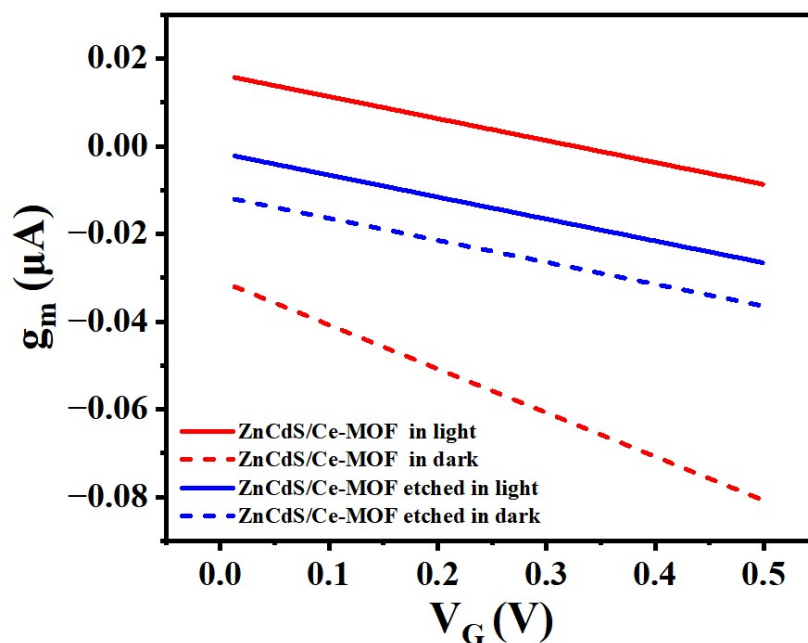

177

178

179 Fig. S8 The transconductance ( $g_m$ ) values of ZnCdS/Ce-MOF and etched ZnCdS/Ce-MOF under dark and illuminated  
180 conditions.

## 181 References

182 1. J. Song, H. Zhao, R. Sun, X. Li and D. Sun, *Energy Environ. Sci.*, 2017, **10**, 225-235.

183 2. Y. F. Zhang, Q. Wang, D. X. Xue and J. Bai, *Inorg. Chem.*, 2020, **59**, 11233-11237.

184 3. J. Chen, Q. Ma, M. Li, D. Chao, L. Huang, W. Wu, Y. Fang and S. Dong, *Nat. Commun.*, 2021, **12**, 3375.

185
